# Supplementary material for: Response of shortwave cloud radiative effect to greenhouse gases and aerosols and its impact on daily maximum temperature
Source: Copernicus journal article supplement (doi:10.5194/acp-2019-1159), 2020-01-27
Supplement: Supplementary file 1 [file acp-2019-1159-supplement.pdf]

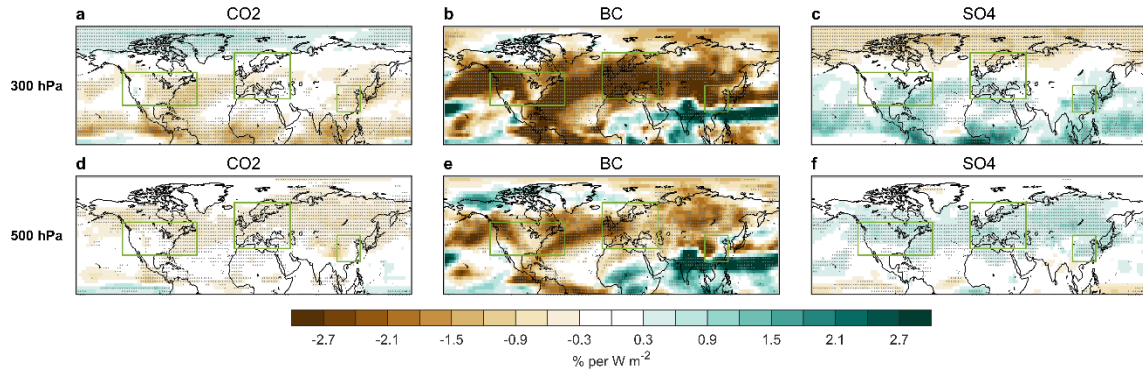

**Figure S1: same as Fig. 2(d-f) in the main text, but for 300 hPa and 500 hPa.**

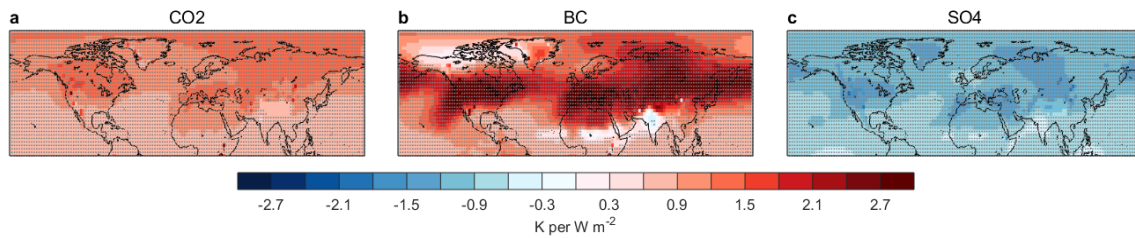

**Figure S2: same as Fig. 2 in the main text, but for temperature at 850 hPa.**

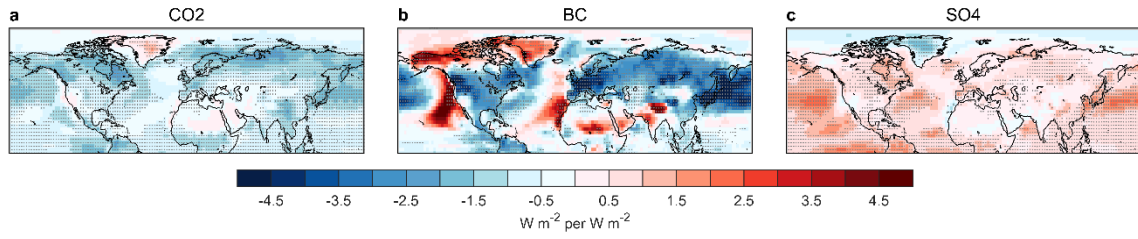

**Figure S3: same as Fig. 2(a-c) in the main text, but for LWCRE.**
